# Supplementary material
Source: Research Square preprint supplement (doi:10.21203/rs.3.rs-9851331/v1)
Supplement: Supplementary file 1 [file 09c6c3b68ffa14289f23d2a6.docx]

Supplementary material for **Day-to-day atmospheric circulation modulated the impact of marine heatwaves on heatstroke risk in Hokkaido in August 2023**

Takehiro Morioka1*ORCID ID: https://orcid.org/0009-0003-8315-0951Correspondence: morioka.takehiro.n7@elms.hokudai.ac.jp

Tomonori Sato2
ORCID ID: https://orcid.org/0000-0001-6541-742X

Author details

1 Graduate School of Environmental Science, Hokkaido University, N10W5 Kita-ku, Sapporo, Hokkaido 060-0810, Japan

2 Faculty of Environmental Earth Science, Hokkaido University, N10W5 Kita Ward, Sapporo, Hokkaido 060-0810, Japan

Contents of this file

Supplement 1: Interannual variation in heatstroke cases.

Supplement 2: Daily variations in meteorological variables.

Supplement 3: Model specifications.

Supplement 4: Model domain.

Supplement 5: Densely populated areas.


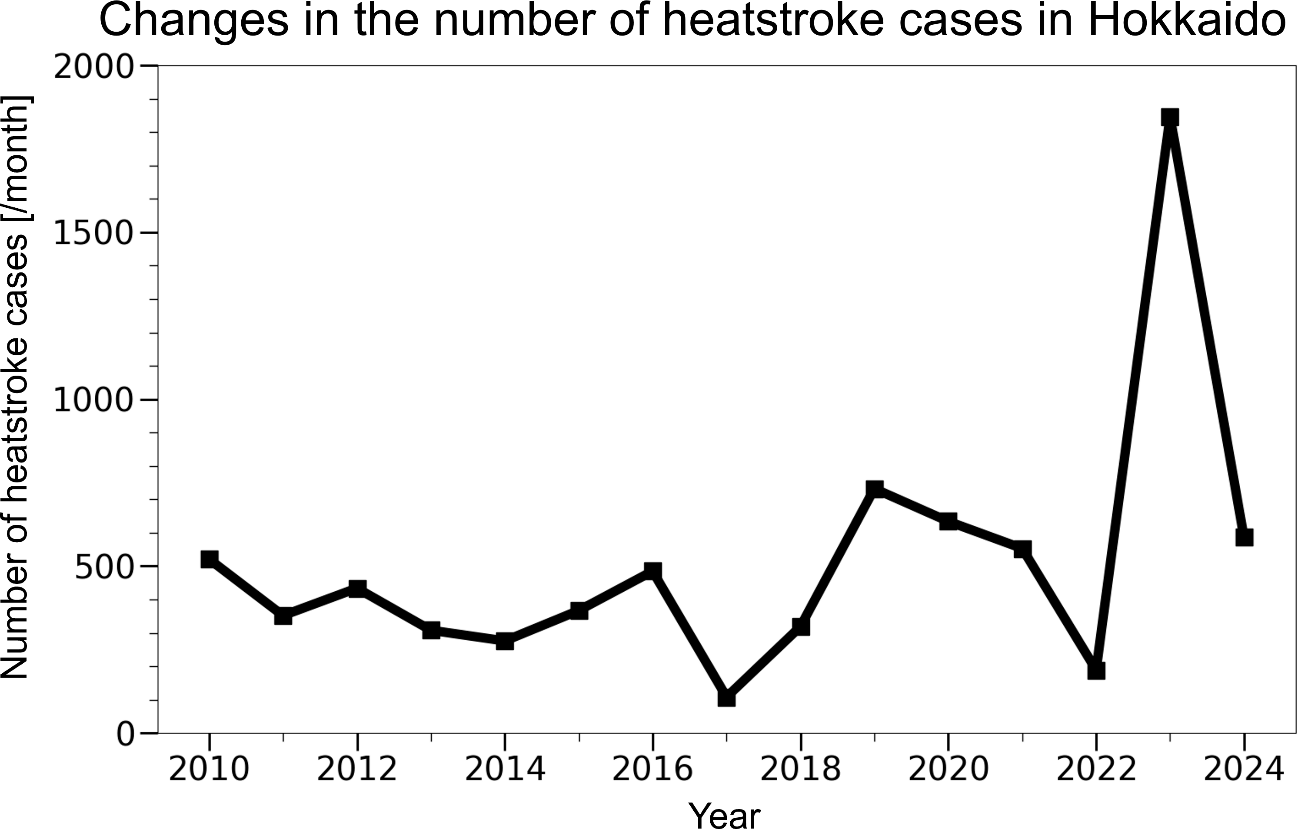


Supplement 1.Interannual variation in heatstroke cases in Hokkaido in August from 2010 to 2024.


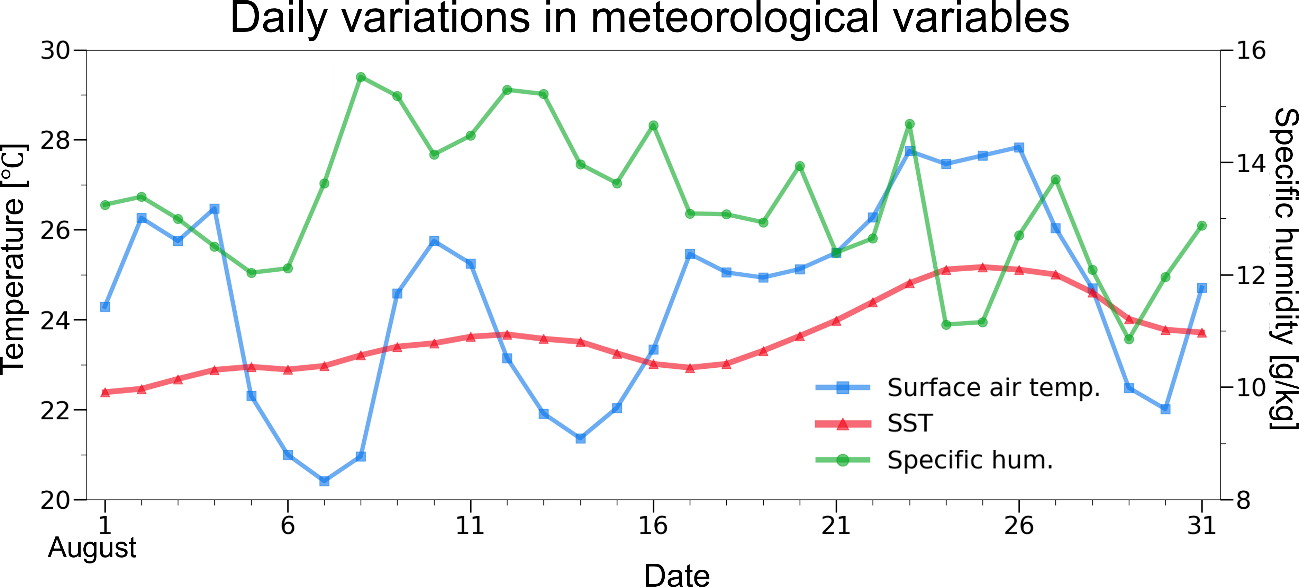


Supplement 2. Daily variations in 2-m air temperature (blue), 2-m specific humidity (green), and SST (red) around Hokkaido in August 2023. Air temperature and specific humidity are averaged over 41°–46°N, 139°–146°E. SST is averaged over 38°–45°N, 135°–150°E.

| **Period** | Start time: 00:00 UTC 20 July 2023 |
| --- | --- |
|  | End time: 18:00 UTC 31 August 2023 |
| **Input data** | MSM (3 h, 5 km) |
|  | OISST (daily, 0.25° × 0.25°) |
| **Grid size** | 5 km |
| **Grid numbers** | 245 × 200 |
| **Layers** | 50 |
| **Physics** | WSM 6-class graupel scheme |
|  | RRTM scheme |
|  | Dudhia scheme |
|  | Grell 3D ensemble scheme |

Supplement 3. WRF-ARW configuration.


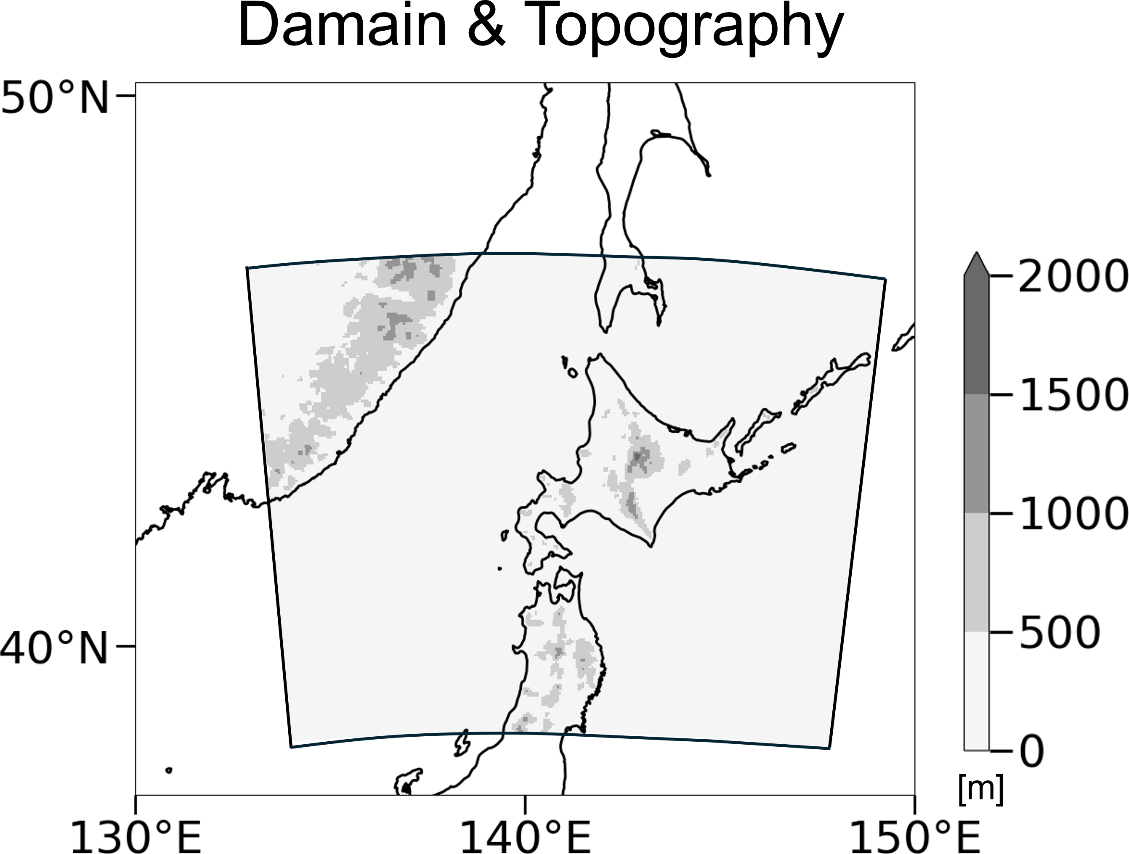


Supplement 4. WRF experimental domain and topography (shading).


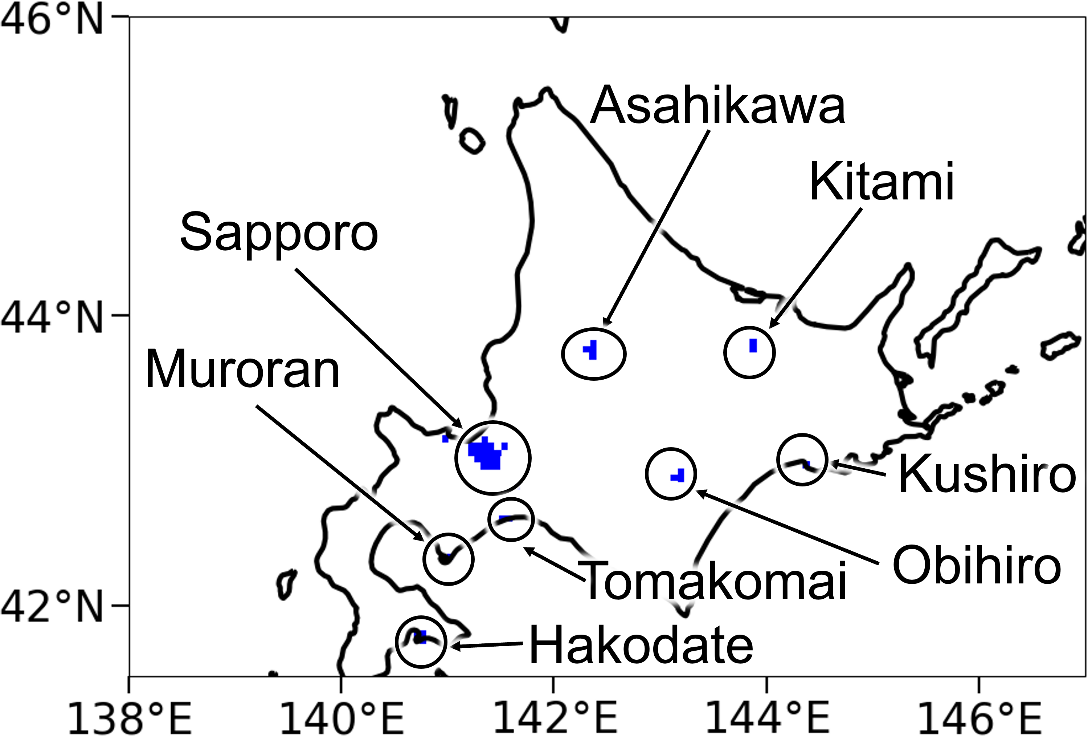


Supplement 5. Areas of high population exposure. This corresponds to the top 1% of the population density in Hokkaido (33,460 people per 25 km2) or higher. Population data are based on the Geospatial Information Authority of Japan’s 2020 population estimates (Geospatial Information Authority of Japan 2024).
